# Supplementary material for: Landscape, Soil, Lithology, Climate and Permafrost Control on Dissolved Carbon, Major and Trace Elements in the Ob River, Western Siberia
Source: MDPI journal article supplement (doi:10.3390/w13223189), 2021-11-11
Supplement: s1 [file s1]

## SUPPLEMENTARY MATERIAL

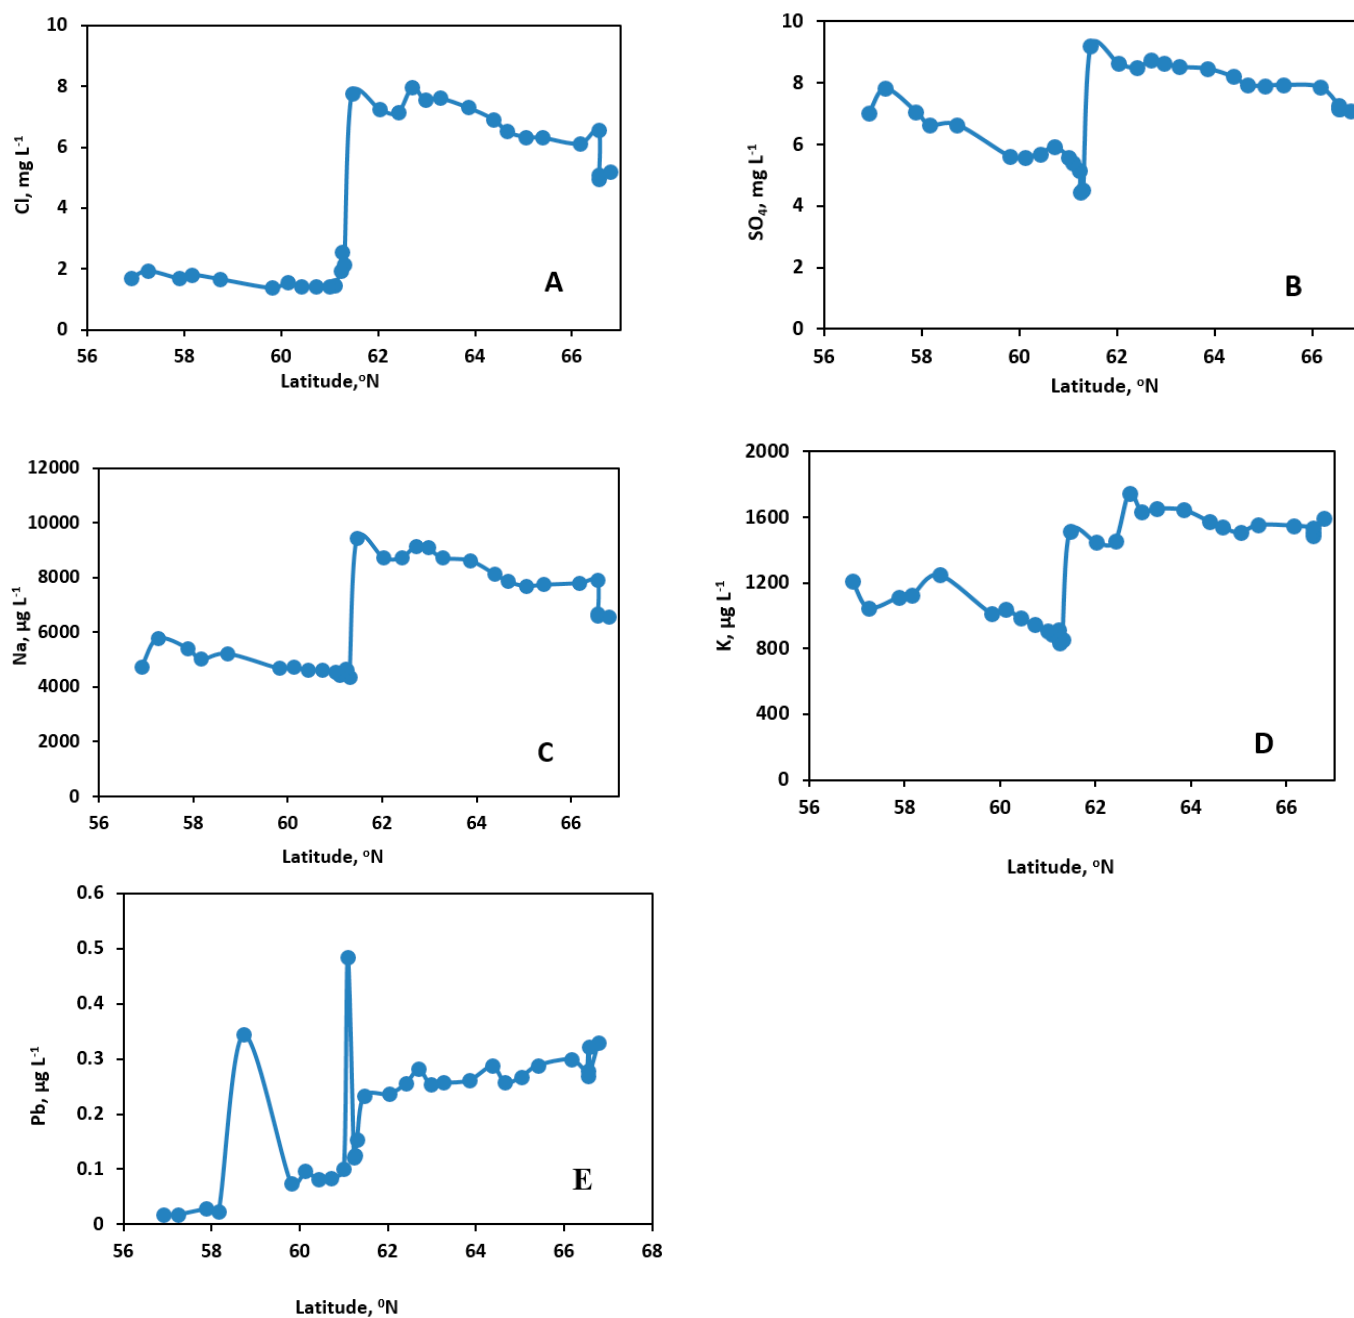

**Figure S1.** Latitudinal dependence of Cl (A), SO<sub>4</sub> (B), Na (C), K (D) and Pb (E) concentration in the main stem of the Ob River. A sharp increase visible at approx. 61°N corresponds to the confluence with the Irtysh River.

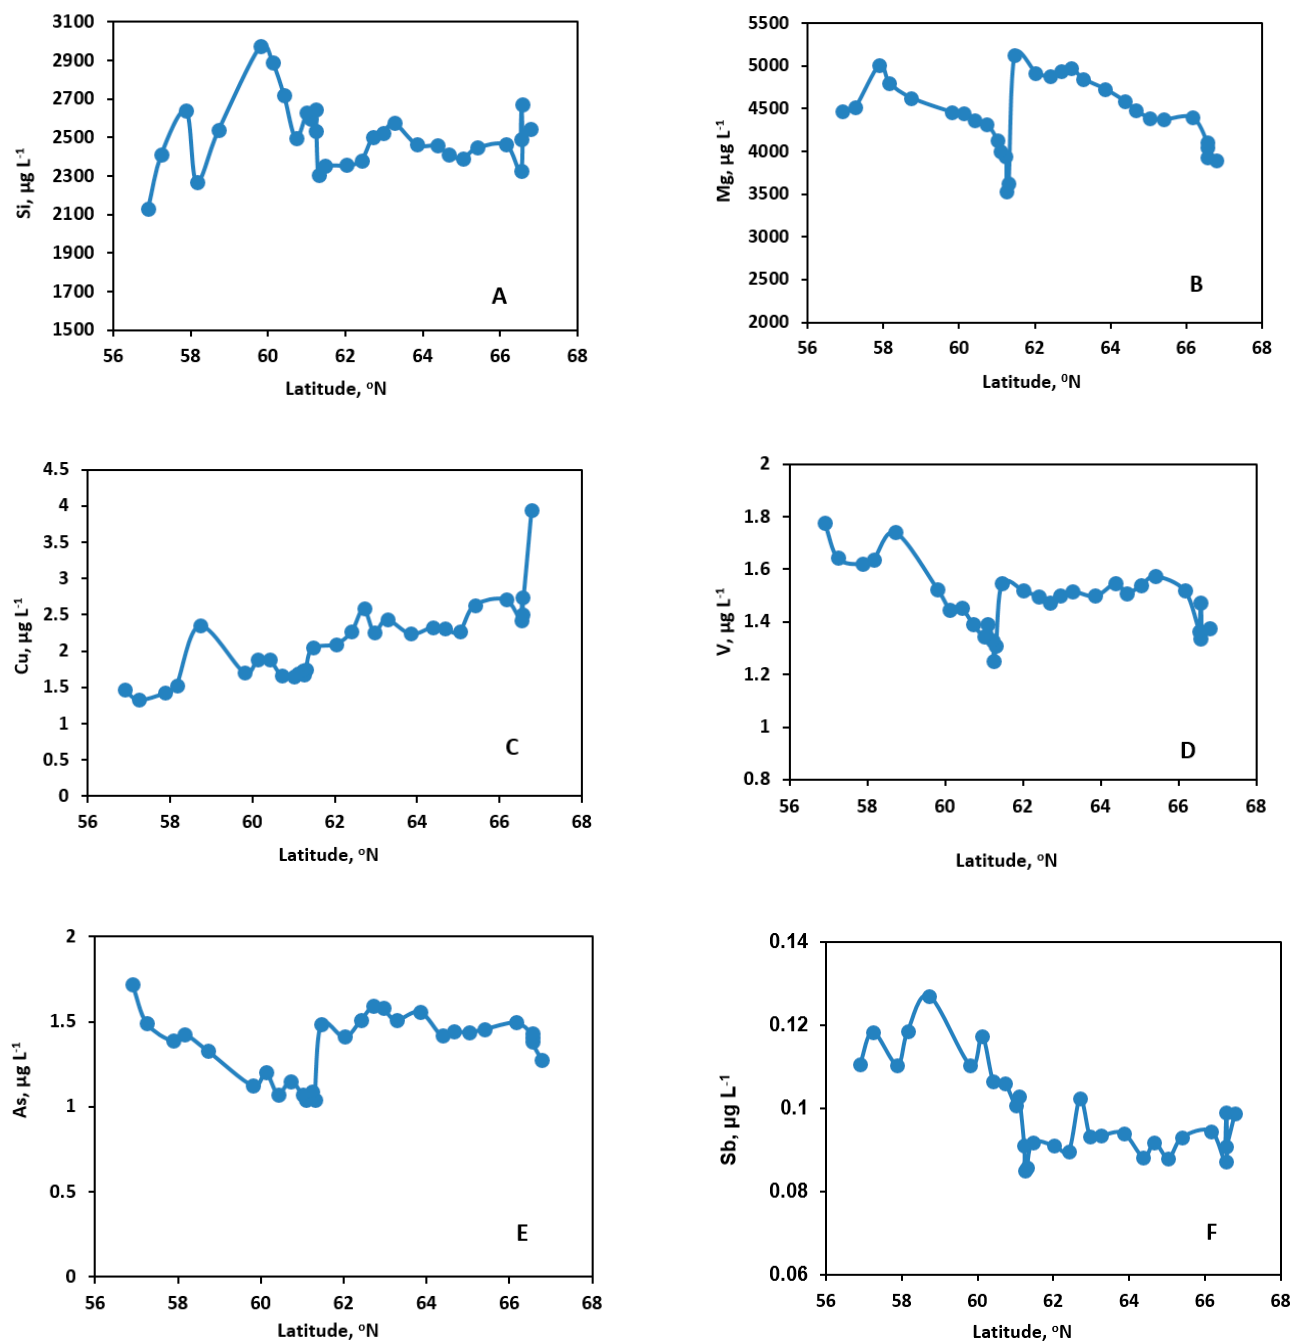

**Figure S2.** Main stem concentration of elements which do not show any particular pattern with latitude: Si (A), Mg (B), Cu (C), V (D), As (E) and Sb (F).

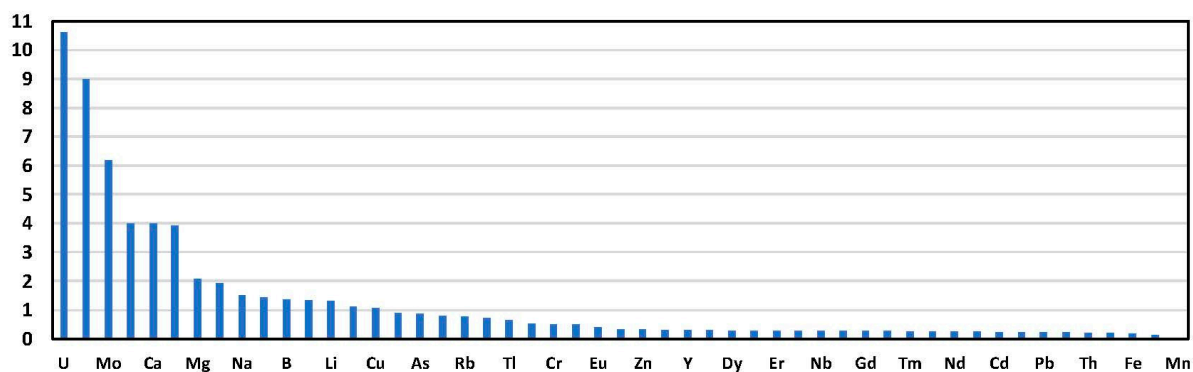

**Figure S3.** A histogram of elemental ratio in 2 northern tributaries (downstream of Irtysh) to 8 southern tributaries (upstream of Irtysh) of the Ob River.

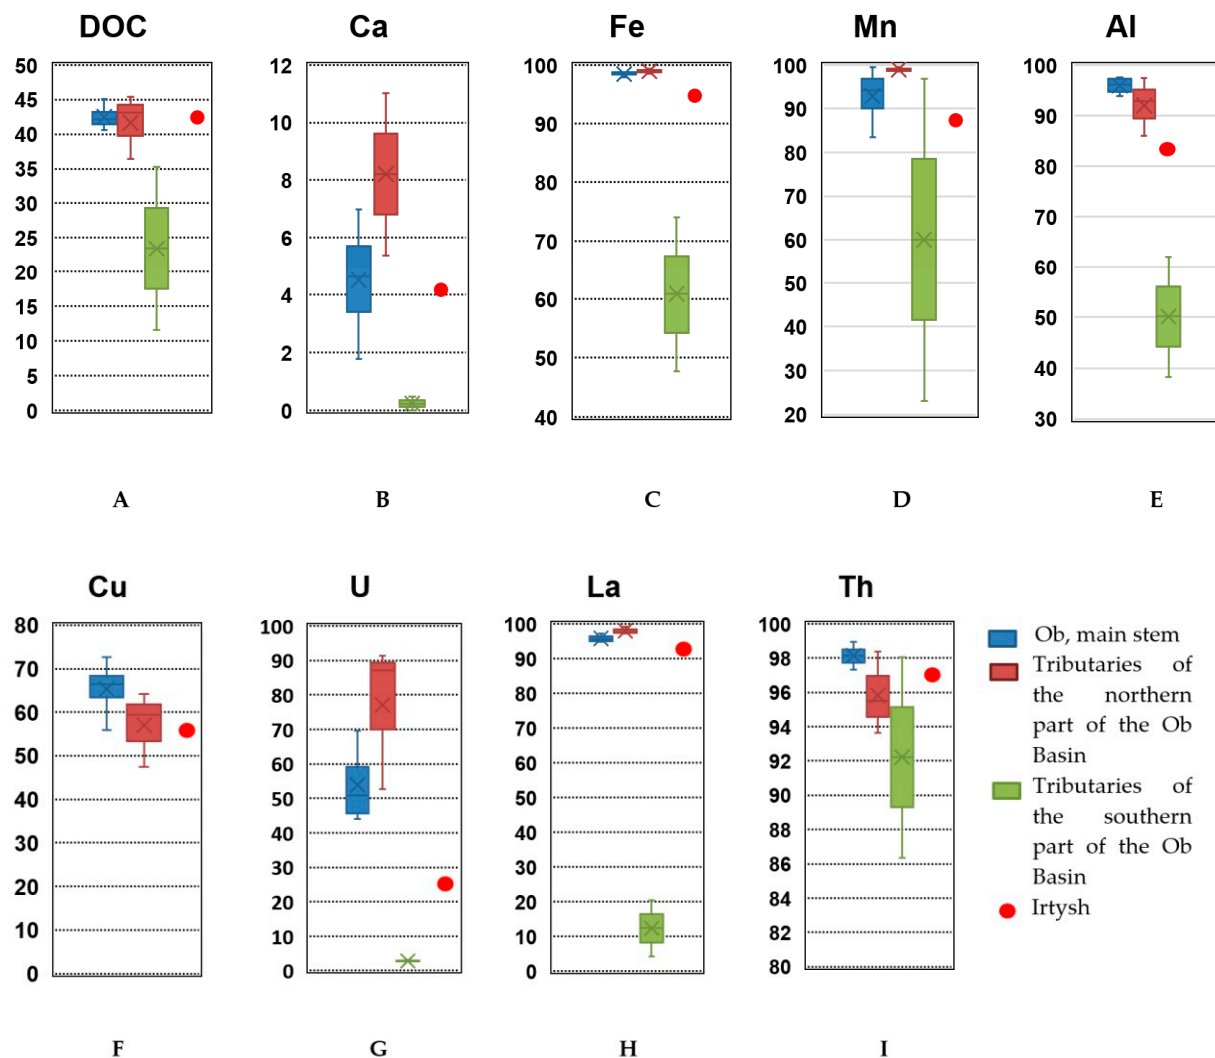

**Figure S4.** Proportion of colloidal (1 kDa - 0.45  $\mu\text{m}$ ) fraction of DOC (A), Ca (B), Fe (C), Mn (D), Al (E), Cu (F), U (G), La (H) and Th (I) in the main stem (blue box plot column) and tributaries of the southern (blue circles) and northern (red circles) part of the Ob Basin.

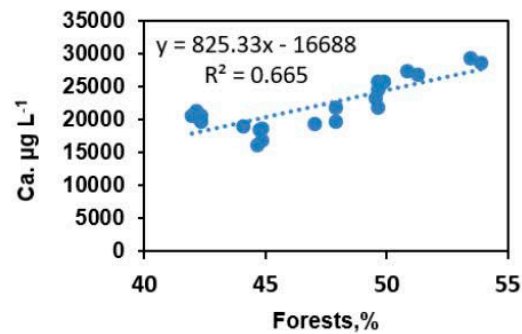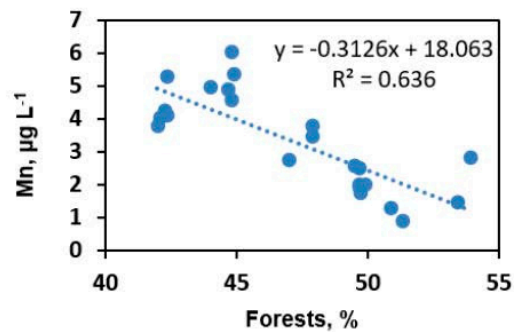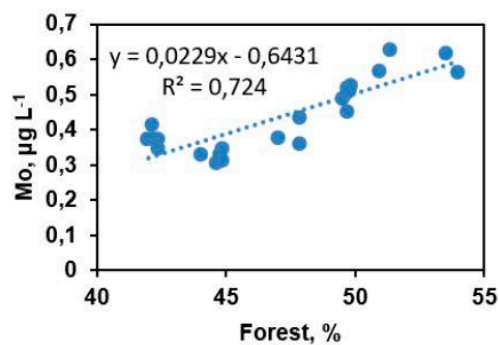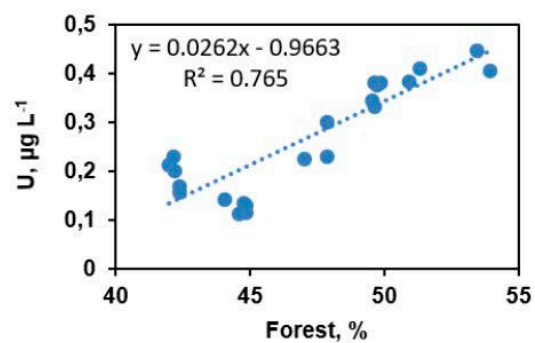

A

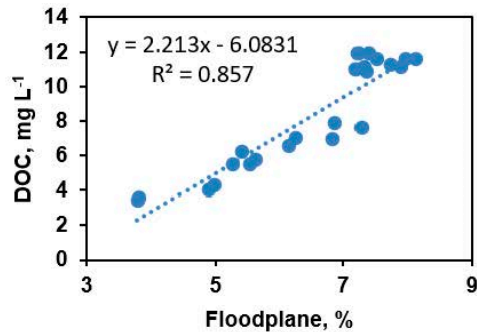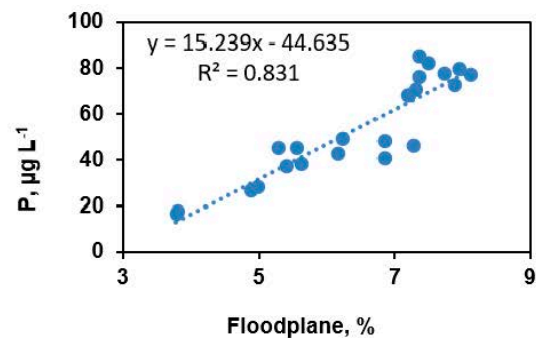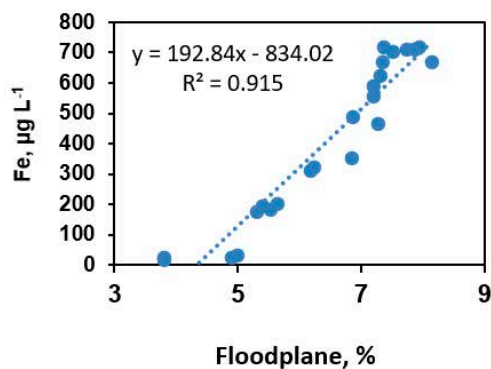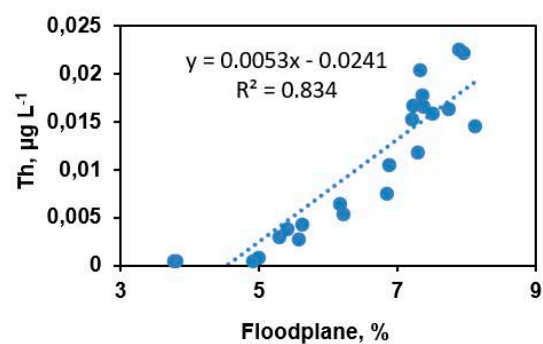

B

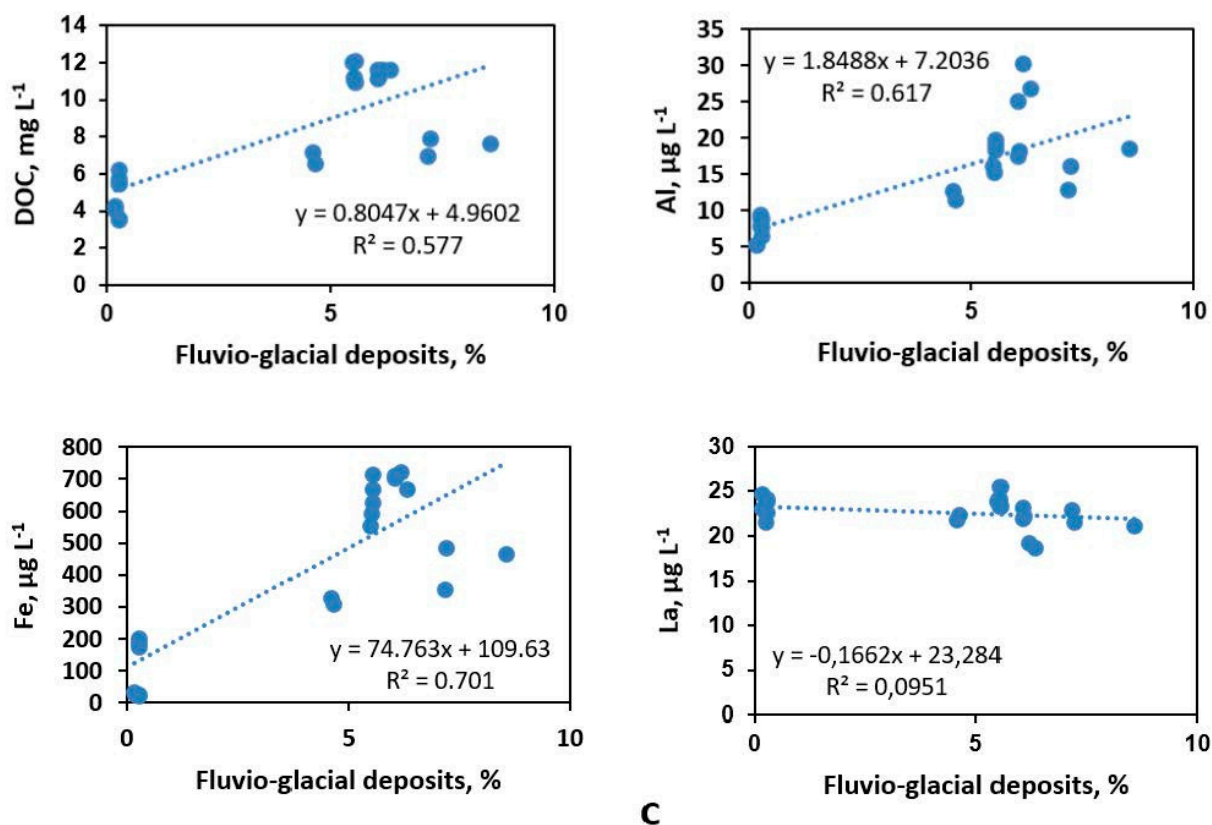

**Figure S5.** Examples of major and trace element concentration with landscape parameters of the Ob River main stem: **A:** Impact of the forest coverage on Ca, Mn, Mo and U; **B:** Impact of the floodplain coverage on DOC, P, Fe and Th concentrations; **C:** Impact of the fluvio-glacial deposits on DOC, Al, Fe and La concentrations. Examples of major and trace element concentration with landscape parameters of the Ob River main stem: **C:** Impact of the fluvio-glacial deposits on DOC, Al, Fe and La concentrations.

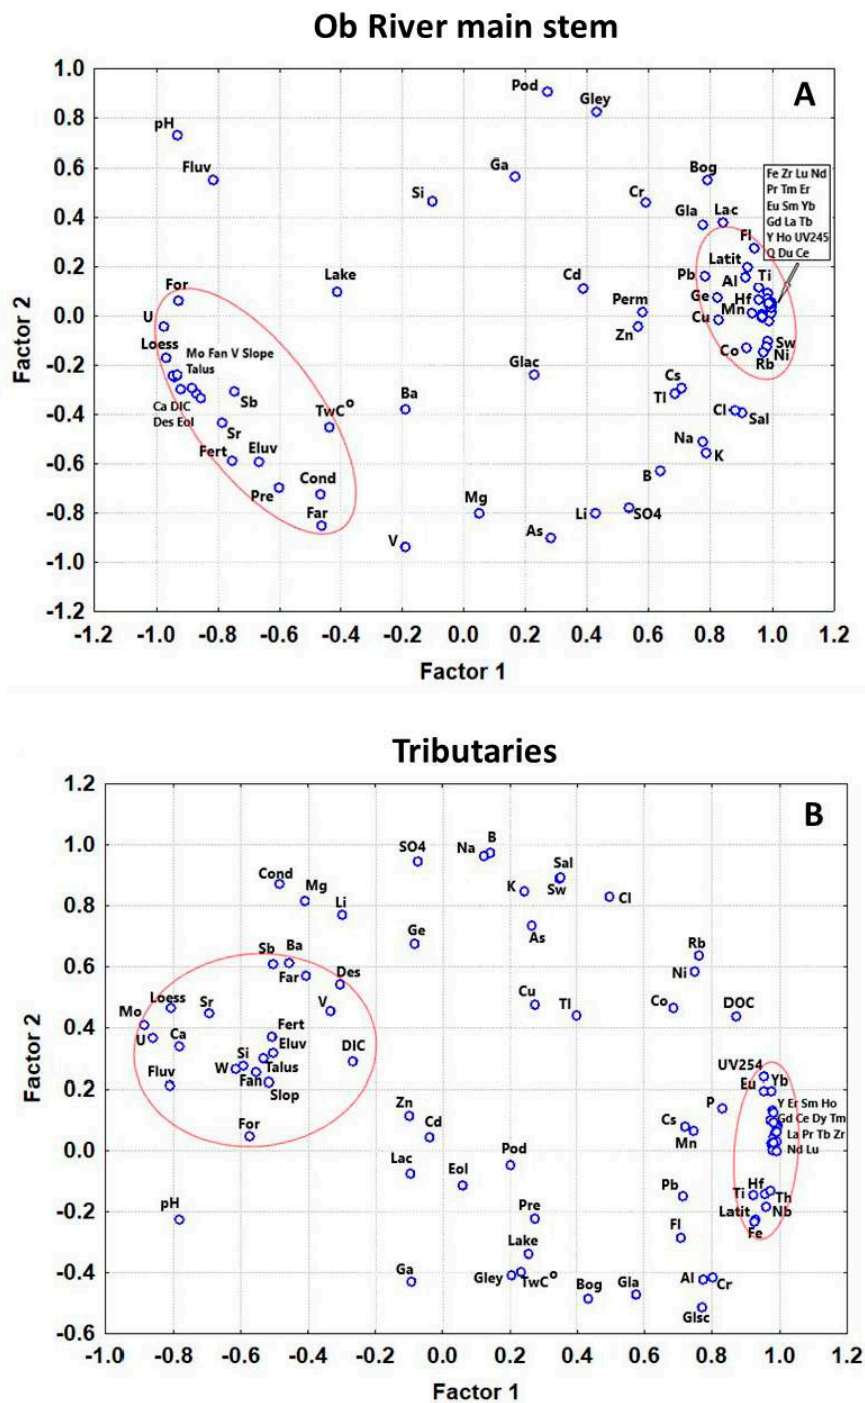

**Figure S6.** Results of PCA treatment of the solute data and watershed characteristics for the Ob River main stem (a) and tributaries. (b). See Figure 7 for abbreviation of landscape parameters.

**Table S1.** List of sampled sites at the main stem of the Ob River and its tributaries.

| Name     | Number on the map       | Descriptions,<br>km | N         | E         | date            |
|----------|-------------------------|---------------------|-----------|-----------|-----------------|
| Ob's g1  | 1                       | 0                   | 66.788694 | 69.143972 | 08.07.16, 21:37 |
| Ob's g2  | 2                       | 74.241              | 66.554056 | 67.839944 | 09.07.16, 11:50 |
| Ob's 1   | 3                       | 120.2               | 66.561925 | 67.032767 | 10.07.2016      |
| Ob's g3  | 4                       | 153.8               | 66.544861 | 66.511833 | 13.07.16, 11:30 |
| Ob's 2   | 5                       | 209.7               | 66.158222 | 65.763806 | 13.07.16, 19:00 |
| Ob's 3   | 6                       | 299.7               | 65.4005   | 65.641667 | 14.07.16, 0:28  |
| Ob's g4  | 7                       | 344.9               | 65.034722 | 65.240833 | 14.07.16, 07:48 |
| Ob's g5  | 8                       | 408.6               | 64.664889 | 65.613806 | 14.07.16, 19:06 |
| Ob's 4   | 9                       | 452.4               | 64.378278 | 65.904444 | 15.07.16, 00:10 |
| Ob's p4  | 10                      | 527.3               | 63.852222 | 65.368917 | 15.07.16, 07:30 |
| Ob's 5   | 11                      | 610.2               | 63.269361 | 64.991528 | 15.07.16, 15:10 |
| Ob's 6   | 12                      | 648.4               | 62.968083 | 65.069278 | 15.07.16, 20:26 |
| Ob's p5  | 13                      | 687.5               | 62.7064   | 65.508883 | 16.07.16, 0:45  |
| Ob's 7   | 14                      | 744.4               | 62.411503 | 66.333239 | 16.07.16, 19:15 |
| Ob's g6  | 15                      | 821.2               | 62.022069 | 67.369903 | 17.07.16, 1:22  |
| Ob's 8   | 16                      | 909.0               | 61.461306 | 68.224083 | 17.07.16, 8:00  |
| Ob's 9   | 17                      | 1149.2              | 61.302833 | 71.286006 | 18.07.16, 8:03  |
| Ob's 10  | 18                      | 1253.9              | 61.243361 | 72.849944 | 18.07.16, 19:27 |
| Ob's 11  | 19                      | 1291.9              | 61.232167 | 73.538694 | 19.07.16, 0:25  |
| Ob's 12  | 20                      | 1419.9              | 61.09325  | 75.326528 | 19.07.16, 8:00  |
| Ob's 13  | 21                      | 1469.9              | 61.004361 | 76.085556 | 19.07.16, 13:15 |
| Ob's 14  | 22                      | 1550.6              | 60.720639 | 77.114083 | 19.07.16, 23:13 |
| Ob's 15  | 23                      | 1624.8              | 60.420694 | 77.978444 | 20.07.16, 5:25  |
| Ob's 16  | 24                      | 1702.0              | 60.124361 | 78.915167 | 20.07.16, 12:06 |
| Ob's 17  | 25                      | 1752.4              | 59.811222 | 79.116    | 20.07.16, 17:51 |
| Ob's 18  | 26                      | 2185.3              | 58.159194 | 82.941139 | 22.07.16, 15:15 |
| Ob's 19  | 27                      | 2230.4              | 57.883861 | 83.345361 | 22.07.16, 19:15 |
| Ob's 20  | 28                      | 2361.7              | 57.245944 | 84.348944 | 23.07.16, 07:23 |
| Ob's 21  | 29                      | 2410.2              | 56.906833 | 84.448892 | 23.07.16, 12:51 |
| Ob's p1  | p_1 (Pasaydevakha)      | 0                   | 67.709    | 72.904389 | 06.07.2016      |
| Ob's p2  | p_2 (Poluy)             | 291.0               | 66.522917 | 66.599611 | 10.07.16, 20:53 |
| Ob's p3  | p_3 (Pitljär)           | 397.0               | 65.771694 | 65.510778 | 13.07.16, 22:20 |
| Ob's p6  | p_4 (Irtys)             | 975.7               | 61.067947 | 68.929806 | 17.07.16, 17:22 |
| Ob's p7  | p_5 (Nazym)             | 1172.0              | 61.193594 | 68.922253 | 17.07.16, 19:21 |
| Ob's p8  | p_6 (Ljamin)            | 1172.0              | 61.280639 | 71.792972 | 18.07.16, 11:39 |
| Ob's p11 | p_7 (Tym)               | 1623.0              | 59.431417 | 80.02025  | 21.07.16, 03:09 |
| Ob's p10 | p_8 (Vasjugan)          | 1257.0              | 59.121222 | 80.744258 | 21.07.16, 11:31 |
| Ob's p12 | p_9 (Kopilovskaja Ket') | 1369.0              | 58.911256 | 81.559931 | 21.07.16, 20:00 |
| Ob's g7  | p_10 (Parabel')         | 2189.0              | 58.727083 | 81.573639 | 21.07.16, 23:33 |
| Ob's p13 | p_11 (Chulyim)          | 2542.0              | 57.729083 | 83.822494 | 23.07.16, 01:00 |
| Ob's p14 | p_12 (Tom')             | 2677.0              | 56.795861 | 84.530528 | 23.07.16, 12:00 |

**Table S2. A:** Main landscape parameters (% of the watershed coverage) of the tributaries and several key points at the Ob River main stem.

| Sam-<br>pling<br>point | latitude    | catchment<br>area. km <sup>2</sup> | Q.<br>m <sup>3</sup> /s | For-<br>ests | Bogs | Lake<br>s | Flood-<br>plain | Farm-<br>land | Perma-<br>frost | Pod-<br>zol | Gley<br>soils | Sa-<br>line<br>soils | Fertile<br>soil |
|------------------------|-------------|------------------------------------|-------------------------|--------------|------|-----------|-----------------|---------------|-----------------|-------------|---------------|----------------------|-----------------|
| g1                     | 66.788<br>7 | 2479211                            | 31683                   | 45           | 20   | 0.02      | 8.13            | 19            | 7.59            | 10.97       | 5.77          | 1.73                 | 18.92           |
| 1                      | 66.561<br>9 | 2450170                            | 30835                   | 45           | 20   | 0.00      | 7.96            | 19            | 6.94            | 11.05       | 5.83          | 1.76                 | 19.14           |
| 2                      | 66.158<br>2 | 2416527                            | 30050                   | 45           | 19   | 0.01      | 7.89            | 19            | 5.66            | 11.04       | 5.50          | 1.78                 | 19.41           |
| 3                      | 65.400<br>5 | 2399324                            | 29616                   | 45           | 19   | 0.00      | 7.74            | 19            | 5.17            | 11.00       | 5.34          | 1.79                 | 19.55           |
| 4                      | 64.378<br>3 | 2360079                            | 28625                   | 44           | 19   | 0.00      | 7.50            | 20            | 4.43            | 10.66       | 4.96          | 1.82                 | 19.87           |
| 5                      | 63.269<br>4 | 2222409                            | 25151                   | 42           | 19   | 0.00      | 7.38            | 21            | 2.62            | 11.32       | 5.14          | 1.93                 | 21.10           |
| 6                      | 62.980<br>6 | 2220366                            | 25099                   | 42           | 19   | 0.00      | 7.35            | 21            | 2.58            | 11.32       | 5.11          | 1.94                 | 21.12           |
| 7                      | 62.411<br>5 | 2210933                            | 24861                   | 42           | 19   | 0.00      | 7.31            | 21            | 2.41            | 11.37       | 5.13          | 1.94                 | 21.21           |
| g6                     | 62.022<br>1 | 2203777                            | 24680                   | 42           | 19   | 0.00      | 7.20            | 21            | 2.30            | 11.40       | 4.93          | 1.95                 | 21.28           |
| 8                      | 61.461<br>3 | 2196865                            | 24506                   | 42           | 19   | 0.02      | 7.22            | 21            | 2.27            | 11.43       | 4.86          | 1.96                 | 21.35           |
| 9                      | 61.302<br>8 | 1100150                            | 18220                   | 47           | 21   | 0.27      | 7.28            | 15            | 2.42            | 16.59       | 5.69          | 0.07                 | 19.20           |
| 10                     | 61.243<br>4 | 1059511                            | 16353                   | 48           | 20   | 0.01      | 6.86            | 15            | 2.37            | 17.22       | 5.91          | 0.07                 | 19.94           |
| 11                     | 61.232<br>2 | 1058205                            | 16295                   | 48           | 20   | 0.37      | 6.84            | 15            | 2.35            | 17.22       | 5.88          | 0.07                 | 19.97           |
| 12                     | 61.093<br>3 | 963155                             | 12046                   | 50           | 17   | 0.00      | 6.24            | 17            | 2.10            | 15.36       | 6.03          | 0.08                 | 21.94           |
| 13                     | 61.004<br>4 | 951873                             | 11542                   | 50           | 17   | 0.50      | 6.16            | 17            | 2.08            | 14.88       | 6.03          | 0.08                 | 22.20           |
| 14                     | 60.720<br>6 | 873109                             | 8021                    | 50           | 15   | 0.01      | 5.63            | 19            | 1.77            | 12.40       | 5.95          | 0.09                 | 24.20           |
| 15                     | 60.420<br>7 | 865715                             | 7730                    | 50           | 14   | 0.03      | 5.55            | 19            | 1.72            | 12.09       | 5.91          | 0.09                 | 24.40           |
| 16                     | 60.124<br>4 | 853949                             | 7607                    | 50           | 14   | 0.05      | 5.42            | 19            | 1.74            | 11.48       | 5.98          | 0.09                 | 24.74           |
| 17                     | 59.811<br>2 | 846169                             | 7538                    | 50           | 14   | 0.22      | 5.29            | 19            | 1.76            | 11.25       | 6.04          | 0.09                 | 24.97           |
| 18                     | 58.159<br>2 | 547112                             | 5763                    | 54           | 3    | 0.01      | 5.00            | 30            | 2.72            | 5.13        | 3.77          | 0.14                 | 38.62           |
| 19                     | 57.883<br>9 | 518674                             | 5464                    | 53           | 2    | 0.05      | 4.90            | 31            | 2.87            | 5.30        | 1.71          | 0.15                 | 40.73           |
| 20                     | 57.245<br>9 | 360677                             | 3799                    | 51           | 1    | 0.00      | 3.79            | 37            | 4.12            | 5.78        | 1.99          | 0.20                 | 44.33           |
| 21                     | 56.906<br>8 | 344424                             | 3628                    | 51           | 0    | 0.77      | 3.81            | 39            | 4.32            | 6.05        | 1.53          | 0.21                 | 45.62           |
| Tom'                   | 56.795<br>8 | 74581                              | 7<br>0<br>2             | 61           | 0    | 0.04      | 2               | 38            | 4.32            | 0.74        | 0.00          | 0.11                 | 84.36           |
| Thculym                | 57.729<br>1 | 133600                             | 6<br>2<br>8             | 66           | 2    | 0.17      | 8               | 23            | 0.00            | 2.83        | 0.00          | 0.04                 | 37.28           |
| Parabel'               | 58.727<br>1 | 24600                              | 9<br>0                  | 58           | 38   | 0.37      | 4               | 0             | 0.00            | 2.69        | 37.56         | 0.00                 | 0.00            |
| Vasju-<br>gan          | 59.121<br>2 | 66404                              | 2<br>1<br>4             | 60           | 40   | 0.20      | 1               | 0             | 0.00            | 10.70       | 30.62         | 0.00                 | 0.00            |
| Tym                    | 59.431<br>4 | 37366                              |                         | 53           | 40   | 0.39      | 8               | 0             | 0.00            | 59.45       | 0.00          | 0.00                 | 0.00            |
| L'yamin                | 61.280<br>6 | 27400                              |                         | 15           | 67   | 10.9<br>5 | 11              | 0             | 0.00            | 22.70       | 0.82          | 0.00                 | 0.00            |



|        |             |         |             |    |    |      |      |    |           |       |       |      |       |
|--------|-------------|---------|-------------|----|----|------|------|----|-----------|-------|-------|------|-------|
| Nazym  | 61.193<br>6 | 11395   |             | 57 | 30 | 1.70 | 13   | 0  | 0.00      | 26.48 | 17.39 | 0.00 | 0.00  |
| Irtysk | 61.067<br>9 | 2183722 | 5980        | 41 | 18 | 0.53 | 6.85 | 21 | 2.03      | 10.95 | 4.51  | 1.97 | 21.48 |
| Poluj  | 66.522<br>9 | 20000   | 1<br>3<br>8 | 45 | 41 | 0.50 | 11   | 0  | 29.6<br>3 | 12.46 | 33.19 | 0.00 | 0.00  |

**Table S2. B:** Main genetic types of Quaternary deposits. % of the watershed. Slopewash, Desertium, and Fanalluvial. deposits represent less than 2% and not listed here.

|                               | Pre-Quaternary | Loess | Glacial | Eluvial | Lacustrine | Fluvial | Talus | Fluvio-glacial | Eolian |
|-------------------------------|----------------|-------|---------|---------|------------|---------|-------|----------------|--------|
| <i>The Ob River main stem</i> |                |       |         |         |            |         |       |                |        |
| <b>g1</b>                     | 2.03           | 17.98 | 5.12    | 2.84    | 16.18      | 22.40   | 1.04  | 6.33           | 0.54   |
| <b>1</b>                      | 2.04           | 18.20 | 4.97    | 2.87    | 16.16      | 22.41   | 1.05  | 6.18           | 0.55   |
| <b>2</b>                      | 2.07           | 18.45 | 4.69    | 2.89    | 15.99      | 22.41   | 1.06  | 6.05           | 0.56   |
| <b>3</b>                      | 2.08           | 18.58 | 4.52    | 2.90    | 15.94      | 22.36   | 1.07  | 6.09           | 0.56   |
| <b>4</b>                      | 2.11           | 18.89 | 4.02    | 2.94    | 15.74      | 22.33   | 1.09  | 6.06           | 0.57   |
| <b>5</b>                      | 2.16           | 20.06 | 2.13    | 2.98    | 15.73      | 22.30   | 1.16  | 5.56           | 0.60   |
| <b>6</b>                      | 2.16           | 20.08 | 2.09    | 2.98    | 15.73      | 22.29   | 1.16  | 5.56           | 0.60   |
| <b>7</b>                      | 2.16           | 20.16 | 1.96    | 3.00    | 15.69      | 22.27   | 1.16  | 5.54           | 0.61   |
| <b>g6</b>                     | 2.13           | 20.23 | 1.88    | 3.01    | 15.69      | 22.24   | 1.17  | 5.52           | 0.61   |
| <b>8</b>                      | 2.11           | 20.29 | 1.88    | 3.01    | 15.64      | 22.19   | 1.17  | 5.49           | 0.61   |
| <b>9</b>                      | 1.83           | 21.20 | 3.06    | 2.59    | 12.88      | 28.71   | 2.15  | 8.57           | 0.71   |
| <b>10</b>                     | 1.86           | 21.71 | 2.83    | 2.69    | 12.97      | 28.82   | 2.24  | 7.22           | 0.67   |
| <b>11</b>                     | 1.86           | 21.73 | 2.83    | 2.69    | 12.98      | 28.80   | 2.24  | 7.17           | 0.67   |
| <b>12</b>                     | 2.04           | 22.27 | 2.23    | 2.96    | 12.66      | 29.31   | 2.46  | 4.59           | 0.64   |
| <b>13</b>                     | 2.07           | 22.00 | 2.23    | 2.99    | 12.48      | 29.30   | 2.49  | 4.65           | 0.64   |
| <b>14</b>                     | 2.18           | 23.43 | 1.85    | 3.26    | 12.91      | 29.68   | 2.72  | 0.27           | 0.66   |
| <b>15</b>                     | 2.20           | 23.19 | 1.85    | 3.29    | 12.90      | 29.66   | 2.74  | 0.27           | 0.66   |
| <b>16</b>                     | 2.23           | 22.89 | 1.88    | 3.34    | 13.03      | 29.34   | 2.78  | 0.28           | 0.67   |
| <b>17</b>                     | 2.25           | 22.75 | 1.89    | 3.37    | 13.15      | 29.05   | 2.80  | 0.28           | 0.68   |
| <b>18</b>                     | 3.06           | 25.77 | 2.93    | 5.21    | 5.39       | 27.23   | 4.33  | 0.18           | 0.89   |
| <b>19</b>                     | 3.22           | 25.39 | 3.09    | 5.49    | 3.45       | 27.27   | 4.57  | 0.19           | 0.94   |
| <b>20</b>                     | 4.15           | 25.97 | 4.40    | 4.02    | 2.83       | 26.20   | 4.94  | 0.27           | 0.83   |
| <b>21</b>                     | 4.35           | 24.58 | 4.60    | 4.21    | 1.95       | 26.35   | 5.18  | 0.29           | 0.86   |
| <i>Tributaries</i>            |                |       |         |         |            |         |       |                |        |
| Tom'                          | 1.57           | 27.62 | 0.67    | 6.07    | 0.52       | 39.46   | 3.03  | 0.00           | 0.02   |
| Tchulym                       | 1.37           | 33.46 | 0.13    | 10.46   | 4.13       | 31.92   | 4.40  | 0.00           | 1.41   |
| Parabel'                      | 0.61           | 20.33 | 0.00    | 0.00    | 44.15      | 34.89   | 0.00  | 0.00           | 0.00   |
| Vasjugan                      | 1.13           | 24.56 | 0.00    | 0.00    | 47.69      | 27.03   | 0.00  | 0.00           | 0.00   |
| Tym                           | 0.98           | 18.47 | 0.00    | 0.00    | 33.39      | 39.05   | 0.00  | 3.69           | 0.83   |
| L'yamin                       | 1.46           | 0.00  | 13.26   | 0.00    | 3.42       | 18.52   | 0.00  | 59.74          | 2.75   |
| Nazym                         | 21.36          | 0.00  | 25.87   | 0.00    | 0.96       | 16.29   | 0.00  | 33.12          | 0.31   |
| Irtys                         | 2.02           | 20.15 | 1.70    | 3.03    | 15.05      | 21.65   | 1.18  | 5.12           | 0.61   |
| Poluj                         | 0.00           | 0.00  | 27.28   | 0.00    | 28.05      | 21.07   | 0.00  | 23.67          | 0.00   |

**Table S3 A and B.** A correlation matrix of element concentration in the Ob main stem tributaries and landscape coverage (%) of the watersheds. Significant ( $p < 0.05$ ,  $n = 23$  for Ob and  $n = 9$  for tributaries)) correlations are given in red.

**A: Landscape and soil characteristics**

|                 | Latitude | Forest | Bogs  | Lakes | Flood-plain | Farm-land | Perma- frost | Perma- frost* | Podzol | Gley soil | Saline soil | Fertile soil |
|-----------------|----------|--------|-------|-------|-------------|-----------|--------------|---------------|--------|-----------|-------------|--------------|
| S.C.            | -0.69    | 0.34   | -0.53 | 0.01  | -0.69       | 0.57      | -0.20        | -0.23         | -0.62  | -0.44     | 0.29        | 0.54         |
| pH              | -0.85    | 0.74   | -0.04 | 0.56  | -0.56       | -0.56     | -0.73        | 0.33          | 0.37   | -0.74     | 0.14        |              |
| UV254           | 0.93     | -0.80  | 0.51  | -0.28 | 0.75        | -0.19     | 0.36         | 0.84          | 0.31   | 0.18      | 0.39        | -0.56        |
| Cl              | 0.66     | -0.75  | 0.23  | -0.40 | 0.42        | 0.29      | 0.51         | 0.34          | -0.05  | -0.25     | 0.69        | -0.24        |
| SO <sub>4</sub> | 0.10     | -0.30  | -0.35 | -0.52 | -0.09       | 0.73      | 0.34         | 0.08          | -0.61  | -0.52     | 0.83        | 0.27         |
| DOC             | 0.88     | -0.80  | 0.48  | -0.28 | 0.73        | -0.12     | 0.28         | 0.62          | 0.29   | 0.11      | 0.43        | -0.51        |
| DIC             | -0.76    | 0.48   | -0.41 | 0.17  | -0.80       | 0.21      | -0.32        | -0.70         | -0.28  | -0.13     | -0.06       | 0.46         |
| Li              | -0.01    | -0.18  | -0.30 | -0.43 | -0.06       | 0.62      | 0.28         | 0.22          | -0.48  | -0.57     | 0.69        | 0.22         |
| B               | 0.18     | -0.28  | -0.07 | -0.32 | 0.22        | 0.49      | 0.21         | 0.28          | -0.44  | -0.49     | 0.61        | -0.01        |
| Na              | 0.24     | -0.33  | -0.10 | -0.42 | 0.17        | 0.57      | 0.38         | 0.30          | -0.48  | -0.47     | 0.71        | 0.04         |
| Mg              | -0.39    | 0.11   | -0.42 | -0.16 | -0.29       | 0.63      | -0.15        | -0.02         | -0.55  | -0.60     | 0.44        | 0.40         |
| Al              | 0.90     | -0.64  | 0.54  | -0.27 | 0.76        | -0.29     | 0.46         | 0.71          | 0.43   | 0.21      | 0.21        | -0.59        |
| Si              | -0.29    | 0.31   | -0.18 | 0.07  | -0.18       | -0.07     | -0.31        | 0.22          | -0.12  | 0.03      | -0.19       | 0.14         |
| P               | 0.86     | -0.69  | 0.42  | -0.35 | 0.78        | -0.13     | 0.32         | 0.79          | 0.24   | 0.11      | 0.39        | -0.50        |
| K               | 0.39     | -0.42  | -0.01 | -0.44 | 0.25        | 0.40      | 0.30         | 0.57          | -0.41  | -0.26     | 0.71        | -0.12        |
| Ca              | -0.92    | 0.68   | -0.48 | 0.31  | -0.69       | 0.25      | -0.51        | -0.77         | -0.36  | -0.29     | -0.25       | 0.53         |
| Ti              | 0.93     | -0.70  | 0.54  | -0.31 | 0.82        | -0.19     | 0.35         | 0.74          | 0.33   | 0.13      | 0.33        | -0.59        |
| V               | -0.31    | 0.11   | -0.21 | -0.12 | -0.42       | 0.38      | 0.02         | 0.18          | -0.50  | -0.29     | 0.39        | 0.16         |
| Cr              | 0.68     | -0.49  | 0.70  | 0.05  | 0.62        | -0.53     | 0.05         | 0.87          | 0.63   | 0.35      | -0.08       | -0.66        |
| Mn              | 0.80     | -0.63  | 0.53  | -0.26 | 0.53        | -0.17     | 0.37         | 0.84          | 0.14   | 0.20      | 0.35        | -0.56        |
| Fe              | 0.97     | -0.74  | 0.56  | -0.39 | 0.80        | -0.26     | 0.40         | 0.84          | 0.37   | 0.22      | 0.32        | -0.61        |
| Co              | 0.66     | -0.50  | 0.38  | -0.27 | 0.63        | 0.02      | 0.40         | 0.85          | -0.09  | -0.10     | 0.35        | -0.46        |
| Ni              | 0.85     | -0.70  | 0.49  | -0.24 | 0.82        | -0.13     | 0.29         | 0.63          | 0.19   | 0.04      | 0.37        | -0.57        |
| Cu              | 0.71     | -0.59  | 0.52  | -0.26 | 0.58        | -0.24     | 0.13         | 0.76          | 0.15   | 0.10      | 0.36        | -0.62        |
| Zn              | 0.29     | 0.02   | 0.14  | -0.08 | 0.32        | 0.03      | 0.29         | -0.16         | -0.44  | 0.11      | 0.14        | -0.32        |
| Ga              | 0.07     | 0.09   | 0.38  | 0.23  | 0.19        | -0.45     | -0.12        | 0.60          | 0.47   | 0.15      | -0.43       | -0.30        |
| Ge              | 0.45     | -0.44  | 0.36  | -0.10 | 0.34        | -0.07     | 0.18         | 0.43          | -0.04  | -0.09     | 0.29        | -0.41        |
| As              | 0.11     | -0.26  | -0.10 | -0.27 | 0.02        | 0.48      | 0.32         | 0.60          | -0.36  | -0.38     | 0.64        | 0.03         |
| Rb              | 0.86     | -0.81  | 0.46  | -0.30 | 0.70        | -0.11     | 0.27         | -0.59         | 0.29   | 0.04      | 0.50        | -0.51        |
| Sr              | -0.85    | 0.53   | -0.51 | 0.25  | -0.63       | 0.39      | -0.48        | 0.75          | -0.45  | -0.40     | -0.04       | 0.55         |
| Y               | 0.96     | -0.79  | 0.50  | -0.42 | 0.75        | -0.17     | 0.38         | 0.82          | 0.29   | 0.13      | 0.45        | -0.57        |
| Zr              | 0.96     | -0.78  | 0.54  | -0.35 | 0.76        | -0.21     | 0.40         | 0.65          | 0.33   | 0.19      | 0.38        | -0.59        |
| Nb              | 0.93     | -0.76  | 0.56  | -0.38 | 0.71        | -0.20     | 0.36         | -0.78         | 0.35   | 0.16      | 0.40        | -0.60        |
| Mo              | -0.94    | 0.67   | -0.48 | 0.35  | -0.70       | 0.26      | -0.48        | 0.43          | -0.36  | -0.34     | -0.26       | 0.53         |
| Cd              | 0.40     | -0.20  | 0.08  | -0.23 | 0.33        | -0.02     | 0.23         | 0.09          | -0.26  | 0.22      | 0.21        | -0.24        |
| Sb              | -0.62    | 0.44   | -0.43 | 0.10  | -0.66       | 0.25      | -0.14        | 0.69          | -0.44  | -0.16     | 0.06        | 0.39         |
| Cs              | 0.61     | -0.52  | 0.30  | -0.22 | 0.50        | 0.11      | 0.55         | -0.28         | -0.02  | -0.11     | 0.46        | -0.37        |
| Ba              | -0.37    | 0.08   | -0.28 | -0.01 | -0.27       | 0.35      | -0.41        | 0.30          | -0.30  | -0.35     | 0.26        | 0.29         |
| La              | 0.97     | -0.77  | 0.50  | -0.43 | 0.76        | -0.18     | 0.37         | 0.71          | 0.30   | 0.16      | 0.44        | -0.58        |
| Ce              | 0.98     | -0.78  | 0.52  | -0.39 | 0.77        | -0.21     | 0.41         | 0.84          | 0.30   | 0.19      | 0.40        | -0.60        |
| Pr              | 0.97     | -0.77  | 0.50  | -0.43 | 0.75        | -0.18     | 0.37         | 0.73          | 0.31   | 0.16      | 0.44        | -0.57        |
| Nd              | 0.97     | -0.78  | 0.52  | -0.42 | 0.77        | -0.19     | 0.38         | 0.75          | 0.32   | 0.16      | 0.43        | -0.59        |
| Sm              | 0.95     | -0.79  | 0.49  | -0.43 | 0.74        | -0.16     | 0.36         | 0.71          | 0.30   | 0.14      | 0.46        | -0.56        |
| Eu              | 0.94     | -0.80  | 0.48  | -0.41 | 0.72        | -0.15     | 0.35         | 0.62          | 0.31   | 0.12      | 0.47        | -0.55        |
| Gd              | 0.97     | -0.78  | 0.52  | -0.42 | 0.76        | -0.19     | 0.39         | 0.79          | 0.30   | 0.16      | 0.42        | -0.58        |
| Tb              | 0.96     | -0.79  | 0.51  | -0.42 | 0.76        | -0.18     | 0.38         | 0.73          | 0.30   | 0.14      | 0.43        | -0.58        |
| Dy              | 0.96     | -0.79  | 0.50  | -0.45 | 0.74        | -0.17     | 0.37         | 0.70          | 0.30   | 0.14      | 0.44        | -0.57        |
| Ho              | 0.96     | -0.79  | 0.50  | -0.43 | 0.72        | -0.17     | 0.40         | 0.73          | 0.31   | 0.15      | 0.46        | -0.57        |
| Er              | 0.95     | -0.79  | 0.49  | -0.39 | 0.74        | -0.17     | 0.36         | 0.73          | 0.30   | 0.14      | 0.45        | -0.56        |
| Tm              | 0.97     | -0.79  | 0.50  | -0.37 | 0.75        | -0.19     | 0.40         | 0.80          | 0.28   | 0.19      | 0.42        | -0.57        |
| Yb              | 0.95     | -0.80  | 0.49  | -0.38 | 0.72        | -0.17     | 0.41         | 0.79          | 0.29   | 0.14      | 0.45        | -0.57        |
| Lu              | 0.96     | -0.77  | 0.54  | -0.36 | 0.76        | -0.21     | 0.37         | 0.74          | 0.34   | 0.19      | 0.39        | -0.59        |
| Hf              | 0.93     | -0.73  | 0.46  | -0.31 | 0.75        | -0.13     | 0.47         | 0.66          | 0.33   | 0.12      | 0.37        | -0.50        |
| W               | -0.81    | 0.58   | -0.34 | 0.32  | -0.78       | 0.07      | -0.35        | -0.79         | -0.16  | -0.11     | -0.27       | 0.40         |
| Tl              | 0.43     | -0.51  | 0.32  | -0.14 | 0.41        | 0.15      | 0.34         | 0.36          | 0.01   | -0.36     | 0.35        | -0.30        |
| Pb              | 0.81     | -0.60  | 0.54  | -0.26 | 0.58        | -0.35     | 0.27         | 0.70          | 0.19   | 0.41      | 0.20        | -0.61        |
| Th              | 0.95     | -0.78  | 0.53  | -0.35 | 0.73        | -0.20     | 0.37         | 0.67          | 0.37   | 0.21      | 0.39        | -0.56        |
| U               | -0.96    | 0.73   | -0.45 | 0.38  | -0.68       | 0.18      | -0.54        | -0.87         | -0.31  | -0.28     | -0.36       | 0.51         |

\* - Only northern sampling points ( $n = 18$ )

**B: Main genetic types of Quaternary deposits**

|                 | Loess | Glacial | Eluvial | Lacustrine | Fluvial | Fluvio-Glacial | Eolian |
|-----------------|-------|---------|---------|------------|---------|----------------|--------|
| S.C.            | 0.60  | -0.64   | 0.60    | -0.10      | 0.25    | -0.82          | 0.19   |
| pH              | 0.62  | -0.32   | -0.05   | -0.56      | 0.57    | -0.39          | 0.28   |
| UV254           | -0.83 | 0.38    | -0.47   | 0.54       | -0.67   | 0.76           | -0.48  |
| Cl              | -0.57 | 0.31    | -0.15   | 0.29       | -0.75   | 0.54           | -0.42  |
| SO <sub>4</sub> | 0.02  | -0.23   | 0.42    | 0.19       | -0.26   | -0.25          | -0.27  |
| DOC             | -0.77 | 0.29    | -0.41   | 0.50       | -0.68   | 0.70           | -0.46  |
| DIC             | 0.61  | -0.53   | 0.39    | -0.20      | 0.44    | -0.75          | 0.26   |
| Na              | -0.21 | -0.16   | 0.21    | 0.37       | -0.36   | -0.07          | -0.39  |
| Mg              | 0.34  | -0.63   | 0.52    | 0.06       | 0.10    | -0.62          | 0.10   |
| Al              | -0.82 | 0.56    | -0.55   | 0.35       | -0.58   | 0.85           | -0.52  |
| Si              | 0.26  | -0.56   | 0.16    | 0.15       | 0.59    | -0.42          | 0.04   |
| P               | -0.78 | 0.26    | -0.38   | 0.59       | -0.56   | 0.62           | -0.44  |
| K               | -0.35 | -0.03   | 0.07    | 0.57       | -0.41   | 0.01           | -0.27  |
| Ca              | 0.76  | -0.66   | 0.49    | -0.31      | 0.62    | -0.87          | 0.49   |
| Ti              | -0.82 | 0.37    | -0.48   | 0.53       | -0.62   | 0.75           | -0.49  |
| Cr              | -0.69 | 0.28    | -0.66   | 0.38       | -0.43   | 0.71           | -0.37  |
| Mn              | -0.67 | 0.28    | -0.47   | 0.62       | -0.65   | 0.58           | -0.57  |
| Fe              | -0.85 | 0.45    | -0.53   | 0.55       | -0.64   | 0.80           | -0.50  |
| Co              | -0.65 | 0.15    | -0.33   | 0.50       | -0.49   | 0.45           | -0.64  |
| Ni              | -0.81 | 0.27    | -0.43   | 0.57       | -0.58   | 0.65           | -0.46  |
| Cu              | -0.78 | 0.08    | -0.49   | 0.74       | -0.37   | 0.45           | -0.43  |
| Zn              | -0.37 | 0.21    | -0.16   | 0.51       | -0.18   | 0.08           | -0.37  |
| Ge              | -0.52 | -0.20   | -0.30   | 0.60       | -0.17   | 0.22           | -0.51  |
| Rb              | -0.81 | 0.22    | -0.41   | 0.54       | -0.62   | 0.68           | -0.45  |
| Sr              | 0.69  | -0.75   | 0.56    | -0.24      | 0.50    | -0.85          | 0.40   |
| Y               | -0.83 | 0.37    | -0.47   | 0.55       | -0.61   | 0.74           | -0.51  |
| Zr              | -0.84 | 0.41    | -0.49   | 0.56       | -0.65   | 0.76           | -0.51  |
| Nb              | -0.82 | 0.35    | -0.51   | 0.56       | -0.65   | 0.73           | -0.54  |
| Mo              | 0.77  | -0.65   | 0.49    | -0.38      | 0.64    | -0.84          | 0.46   |
| Cd              | -0.39 | 0.11    | -0.16   | 0.40       | -0.19   | 0.08           | -0.61  |
| Sb              | 0.46  | -0.48   | 0.37    | -0.01      | 0.49    | -0.74          | 0.10   |
| Cs              | -0.66 | 0.42    | -0.29   | 0.39       | -0.60   | 0.51           | -0.52  |
| Ba              | 0.29  | -0.73   | 0.38    | 0.13       | 0.18    | -0.54          | 0.22   |
| La              | -0.83 | 0.40    | -0.48   | 0.54       | -0.62   | 0.75           | -0.49  |
| Ce              | -0.85 | 0.44    | -0.50   | 0.57       | -0.63   | 0.77           | -0.50  |
| Pr              | -0.83 | 0.39    | -0.47   | 0.54       | -0.61   | 0.75           | -0.50  |
| Nd              | -0.84 | 0.41    | -0.49   | 0.56       | -0.63   | 0.76           | -0.48  |
| Sm              | -0.82 | 0.35    | -0.46   | 0.55       | -0.62   | 0.74           | -0.49  |
| Eu              | -0.82 | 0.34    | -0.45   | 0.54       | -0.62   | 0.72           | -0.49  |
| Gd              | -0.84 | 0.39    | -0.48   | 0.56       | -0.61   | 0.76           | -0.52  |
| Tb              | -0.84 | 0.39    | -0.48   | 0.55       | -0.62   | 0.75           | -0.50  |
| Dy              | -0.82 | 0.38    | -0.47   | 0.54       | -0.63   | 0.75           | -0.50  |
| Ho              | -0.83 | 0.39    | -0.47   | 0.55       | -0.62   | 0.75           | -0.52  |
| Er              | -0.83 | 0.35    | -0.46   | 0.55       | -0.62   | 0.74           | -0.50  |
| Tm              | -0.84 | 0.41    | -0.47   | 0.55       | -0.63   | 0.76           | -0.52  |
| Yb              | -0.83 | 0.39    | -0.48   | 0.55       | -0.62   | 0.75           | -0.51  |
| Lu              | -0.84 | 0.38    | -0.49   | 0.56       | -0.63   | 0.76           | -0.52  |
| Hf              | -0.80 | 0.50    | -0.42   | 0.42       | -0.67   | 0.78           | -0.48  |
| W               | 0.61  | -0.44   | 0.28    | -0.33      | 0.56    | -0.66          | 0.33   |
| Pb              | -0.75 | 0.29    | -0.56   | 0.60       | -0.44   | 0.57           | -0.63  |
| Th              | -0.82 | 0.38    | -0.47   | 0.53       | -0.67   | 0.75           | -0.52  |
| U               | 0.78  | -0.63   | 0.45    | -0.40      | 0.68    | -0.83          | 0.51   |

**Table S4.** Proportion of colloidal fraction of elements in the Ob River downstream of Irtysh (4 points) and 7 tributaries. Elements not listed in this table (Li, B, Si, Cl, DIC...) exhibited less than 5-10 % of colloids in all studied samples.

|     | <i>p-1 (Pasay-deyakha)</i> | <i>2 (Ob')</i> | <i>p-2 (Poluy)</i> | <i>p-3 (Pitljär)</i> | <i>8 (Ob')</i> | <i>10 (Ob')</i> | <i>11 (Ob')</i> | <i>p-4 (Irtysh)</i> | <i>p-9 (Ket')</i> | <i>p-12 (Tom')</i> |
|-----|----------------------------|----------------|--------------------|----------------------|----------------|-----------------|-----------------|---------------------|-------------------|--------------------|
| DOC | 43                         | 43             | 45                 | 36                   | 41             | 45              | 42              | 42                  | 12                | 35                 |
| Al  | 86                         | 95             | 93                 | 97                   | 98             | 97              | 94              | 79                  | 62                | 38                 |
| P   | 98                         | 98             | 87                 | 94                   | 84             | 85              | 93              | 74                  | 41                | 78                 |
| Ca  | nd                         | 7              | 11                 | 5                    | 5              | 2               | 4               | 4                   | 0                 | 0                  |
| Ti  | 71                         | 73             | 79                 | 78                   | 74             | 79              | 78              | 60                  | 34                | 9                  |
| V   | 76                         | 74             | 68                 | 58                   | 65             | 61              | 64              | 36                  | 11                | 11                 |
| Cr  | 60                         | 54             | 61                 | 59                   | 46             | 55              | 64              | 15                  | 27                | nd                 |
| Mn  | 99                         | 92             | 99                 | 100                  | 100            | 83              | 96              | 99                  | 23                | 97                 |
| Fe  | 99                         | 99             | 99                 | 99                   | 99             | 98              | 98              | 96                  | 74                | 48                 |
| Co  | 92                         | 68             | 84                 | 69                   | 65             | 67              | 64              | 85                  | 15                | 47                 |
| Ni  | 41                         | 51             | 76                 | 54                   | 49             | 51              | 47              | 46                  | 31                | 14                 |
| Cu  | 47                         | 66             | 59                 | 64                   | 56             | 73              | 67              | 55                  | nd                | nd                 |
| Zn  | 92                         | nd             | 96                 | 67                   | 83             | 77              | 47              | 92                  | nd                | nd                 |
| Ga  | 86                         | nd             | nd                 | 87                   | 8              | 68              | 84              | 85                  | 47                | 12                 |
| Ge  | 14                         | 0              | 11                 | 13                   | 0              | 12              | 1               | 16                  | nd                | 0                  |
| As  | 56                         | 43             | 37                 | 39                   | 47             | 44              | 36              | 22                  | 9                 | 0                  |
| Y   | 97                         | 96             | 96                 | 95                   | 95             | 95              | 94              | 89                  | 76                | 73                 |
| Zr  | 99                         | 96             | 99                 | 98                   | 98             | 98              | 98              | 95                  | 93                | 89                 |
| Nb  | nd                         | 51             | 84                 | 96                   | 96             | 94              | 89              | 60                  | 23                | nd                 |
| Mo  | 8                          | 1              | 0                  | 4                    | 10             | 1               | 6               | 4                   | 0                 | 0                  |
| Cd  | 78                         | nd             | 85                 | 38                   | 43             | nd              | 25              | 29                  | nd                | nd                 |
| Sb  | 0                          | 0              | 21                 | 26                   | 19             | 16              | 12              | 17                  | 0                 | 2                  |
| Cs  | nd                         | <10            | 36                 | 43                   | 54             | 46              | 33              | 13                  | nd                | nd                 |
| Ba  | 0                          | 17             | 35                 | 12                   | 14             | 13              | 12              | 13                  | 0                 | 1                  |
| La  | 99                         | 95             | 97                 | 97                   | 97             | 96              | 95              | 91                  | 4                 | 20                 |
| Ce  | 99                         | 97             | 98                 | 99                   | 99             | 99              | 98              | 97                  | 71                | 63                 |
| Pr  | 99                         | 98             | 98                 | 98                   | 98             | 98              | 97              | 95                  | 86                | 88                 |
| Nd  | 99                         | 98             | 98                 | 98                   | 97             | 98              | 97              | 94                  | 78                | 84                 |
| Sm  | 98                         | 97             | 96                 | 97                   | 98             | 96              | 95              | 96                  | 80                | 92                 |
| Eu  | 97                         | 91             | 97                 | 85                   | 85             | 88              | 88              | 82                  | 52                | 23                 |
| Gd  | 99                         | 97             | 97                 | 97                   | 97             | 97              | 96              | 94                  | 68                | 80                 |
| Tb  | 99                         | 97             | 97                 | 97                   | 95             | 97              | 97              | 94                  | 76                | 77                 |
| Dy  | 98                         | 97             | 97                 | 97                   | 96             | 96              | 96              | 95                  | 78                | 86                 |
| Ho  | 98                         | 98             | 97                 | 97                   | 97             | 95              | 96              | 90                  | 85                | 89                 |
| Er  | 97                         | 97             | 95                 | 96                   | 95             | 96              | 96              | 91                  | 69                | 61                 |
| Tm  | 96                         | 94             | 92                 | 95                   | 97             | 99              | 92              | 86                  | 78                | 51                 |
| Yb  | 96                         | 96             | 95                 | 96                   | 94             | 95              | 91              | 89                  | 54                | 74                 |
| Lu  | 93                         | 98             | 94                 | 92                   | 93             | 92              | 90              | 84                  | 69                | 45                 |
| Hf  | 98                         | 97             | 99                 | 92                   | 88             | 94              | 96              | 88                  | 68                | 75                 |
| W   | nd                         | 0              | 43                 | 36                   | 48             | 37              | 17              | 19                  | 4                 | 3                  |
| Tl  | 44                         | 0              | 67                 | 30                   | 26             | 11              | 0               | nd                  | 5                 | 13                 |
| Pb  | 99                         | 98             | 99                 | 100                  | 100            | 99              | 96              | 95                  | 25                | nd                 |
| Th  | 94                         | 99             | 96                 | 98                   | 97             | 98              | 98              | 97                  | 86                | 98                 |
| U   | 87                         | 70             | 91                 | 53                   | 56             | 46              | 44              | 25                  | 3                 | 3                  |
